# Supplementary material for: An optimized isolation protocol yields high‐quality RNA from cassava tissues (Manihot esculenta Crantz)
Source: PubMed Central journal article supplement (PMC6443859; doi:10.1002/2211-5463.12561), 2019-02-20
Supplement: FEB4-9-814-s001.pdf [file FEB4-9-814-s001.pdf]

# 1 Supporting information

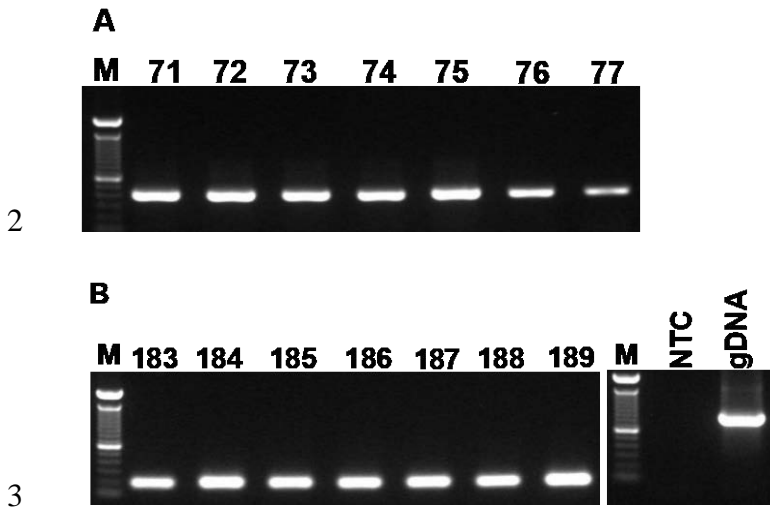

4 **Fig. S1.** Conventional PCR using cDNA from total RNA that was extracted from cassava HMC-1 (A) and ESP  
5 (B) samples grown in short day (SD) conditions for indicated times; analyses were performed using primers for  
6 *G3pdh*. M: 1 Kb ladder; 71, HMC-1, 0 h LD; 72, HMC-1 4 h LD; 73, HMC-1, 8 h LD; 74, HMC-1, 12 h LD; 75,  
7 HMC-1, 16 h LD; 76, HMC-1, 20 h LD; 77, HMC-1, 24 h LD; 183, ESP, 0 h LD; 184, ESP, 4 h LD; 185, ESP,  
8 8 h LD; 186, ESP, 12 h LD; 187, ESP, 16 h LD; 188, ESP, 20 h LD; 189, ESP, 24 h LD; NTC, non-template  
9 negative control (water); gDNA, cassava genomic DNA.

10  
11  
12  
13  
14  
15  
16  
17  
18  
19  
20  
21  
22

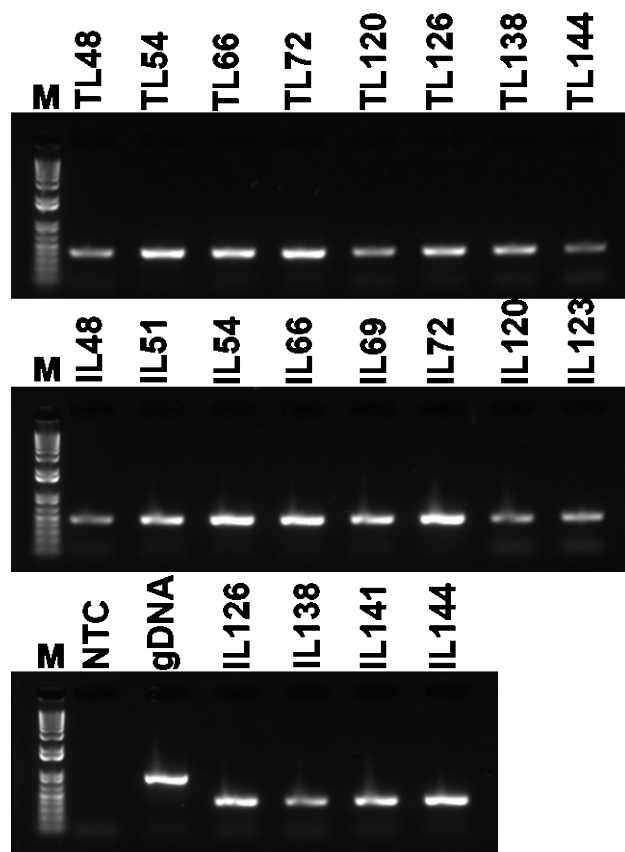

23

24 **Fig. S2.** Conventional PCR using primers for the housekeeping gene *G3pdh* cDNAs corresponding to total RNA  
 25 from various tissues; cassava ESP genotype was grown in pots or *in vitro* at 15 °C and 30 °C under long day (LD)  
 26 conditions from 16 h in growth chambers; M, 1 Kb ladder; Biological repeat 1: TL48, buds and young leaves from  
 27 potted plants grown at 15 °C; TL54, stems from potted plants grown at 15 °C; Biological repeat 2: TL66, buds  
 28 and young leaves from potted plants grown at 15 °C; TL72, stems from potted plants grown at 15 °C; Biological  
 29 repeat 1: TL120, buds and young leaves from potted plants grown at 30 °C; TL126, stems from potted plants  
 30 grown at 30 °C; Biological repeat 2: TL138, buds and young leaves from potted plants grown at 30 °C; IL141,  
 31 stems from *in vitro* plants grown at 30 °C; TL144, stems from potted plants grown at 30 °C; Biological repeat 1:  
 32 IL48, leaves from *in vitro* plants grown at 15 °C; IL51, stems from *in vitro* plants grown at 15 °C; IL54, roots *in*  
 33 *vitro* plants grown at 15 °C; Biological repeat 2: IL66, leaves *in vitro* plants grown at 15 °C; IL69, stems *in vitro*  
 34 plants grown at 15 °C; IL72, roots *in vitro* plants grown at 15 °C; Biological repeat 1: IL120, leaves from *in vitro*  
 35 plants grown at 30 °C; IL123, stems from *in vitro* plants grown at 30 °C; IL126: roots from *in vitro* plants grown  
 36 at 30 °C; Biological repeat 2: IL138; leaves from *in vitro* plants grown at 30 °C; IL141, stems from *in vitro* plants  
 37 grown at 30 °C; IL144, roots from *in vitro* plants grown at 30 °C; NTC, negative control, water template; gDNA,  
 38 cassava genomic DNA.

39  
 40

**Electrophoresis File Run Summary**

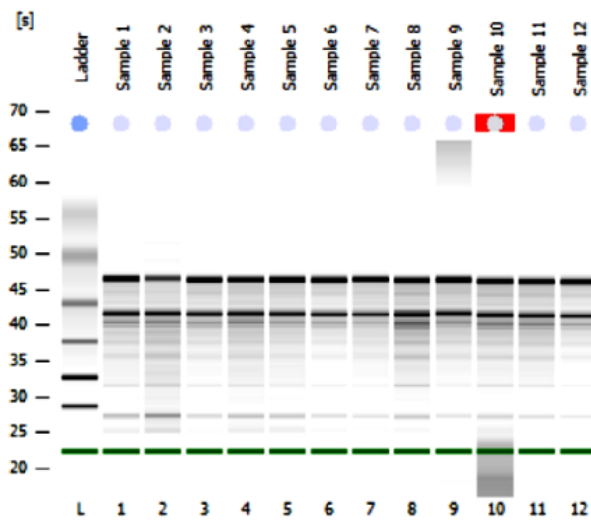

**Instrument Information:**

Instrument Name: DE13807113      Firmware: C.01.069  
Serial#: DE13807113      Type: G2939A

**Assay Information:**

Assay Origin Path: C:\Program Files (x86)\Agilent\2100 bioanalyzer\2100 expert\assays\RNA\Plant RNA Nano.xsy  
Assay Class: Plant RNA Nano  
Version: 1.3  
Assay Comments: Total RNA Analysis ng sensitivity (Plant)  
© Copyright 2003 - 2009 Agilent Technologies, Inc.

**Chip Information:**

Chip Lot #:  
Reagent Kit Lot #:  
Chip Comments:

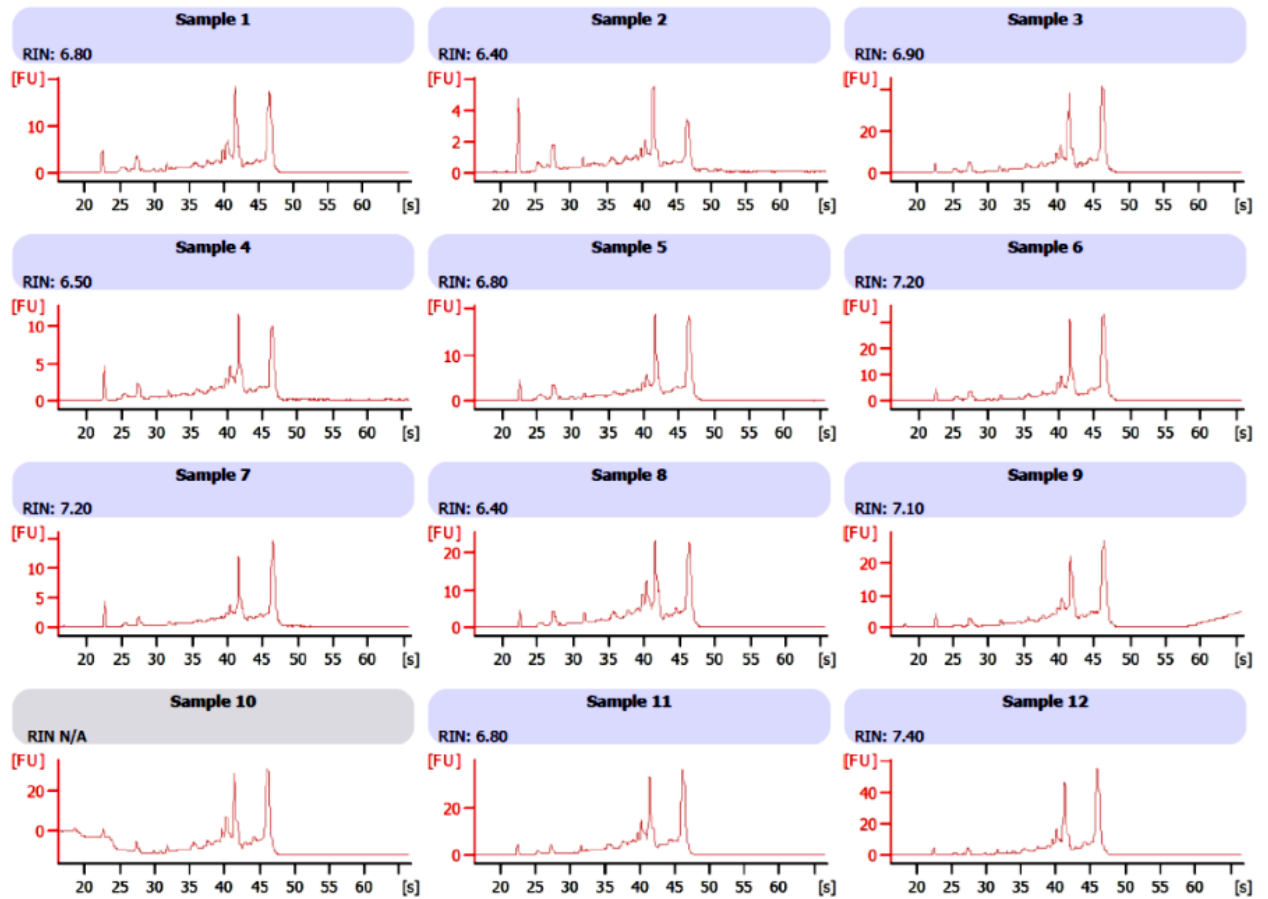

41

42 **Fig. S3.** Electrophoresis run summary using Bioanalyzer 2100 expert\_Plant RNA Nano shows RNAs in gels and  
43 electropherograms; total RNAs were extracted from cassava leaves at indicated time points. The graph shows  
44 RNA quality according to ribosomal integrity numbers (RINs).  
45  
46

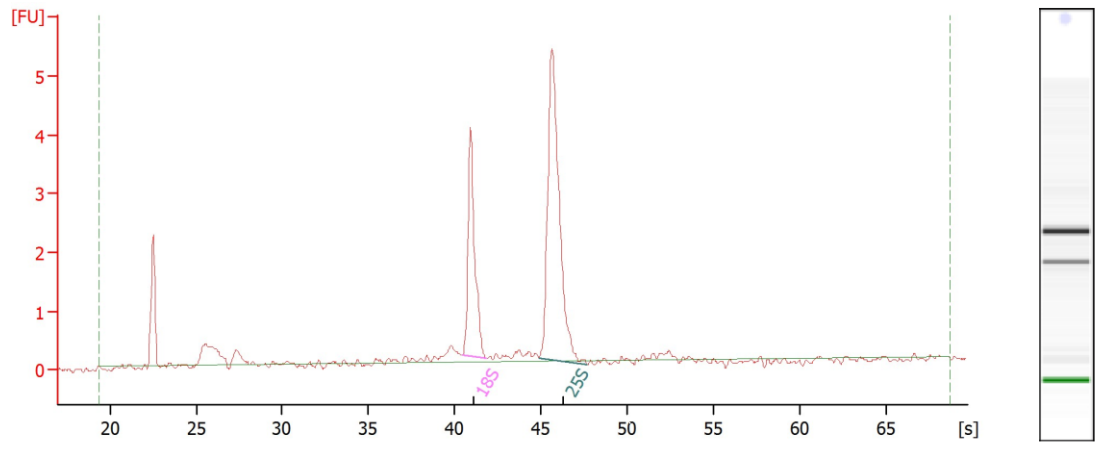

**Cassava (Cultivar: HMC-1) fresh leaf from photoperiod experiment**

- RNA Concentration: 21 ng/μl
- rRNA Ratio [25s / 18s]: 2.1
- RNA Integrity Number (RIN): 9.6 (B.02.08)

47  
48  
49  
50  
51

**Fig. S4.** Electropherograms of total RNA from cassava obtained using our method showing 18S and 25S rRNA regions with RNA concentrations and RIN values. The RNA was from fresh leaves of Cassava HMC-1 cultivar. RNAs were visualized in denaturing agarose gels stained with SYBr safe. RNAs were analyzed using Agilent RNA 6000 Nano Assays in a 2100 Bioanalyzer (Agilent Technologies) and were then used for qRT-PCR.

**Electrophoresis File Run Summary**

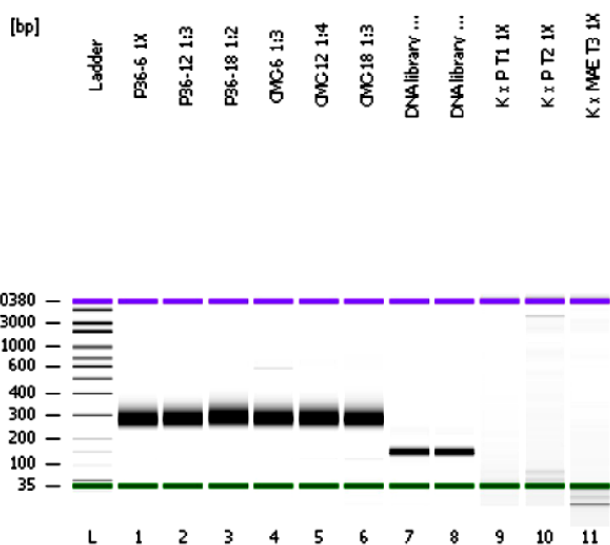

**Instrument Information:**

Instrument Name: DE24802735      Firmware: C.01.069  
 Serial#: DE24802735      Type: G2938B

**Assay Information:**

Assay Origin Path: C:\Program Files\Agilent\2100 bioanalyzer\2100 expert\assays\dsDNA\High Sensitivity DNA.xsy  
 Assay Class: High Sensitivity DNA Assay  
 Version: 1.03  
 Assay Comments: Copyright © 2003-2010 Agilent Technologies

**Chip Information:**

Chip Lot #:   
 Reagent Kit Lot #:   
 Chip Comments:

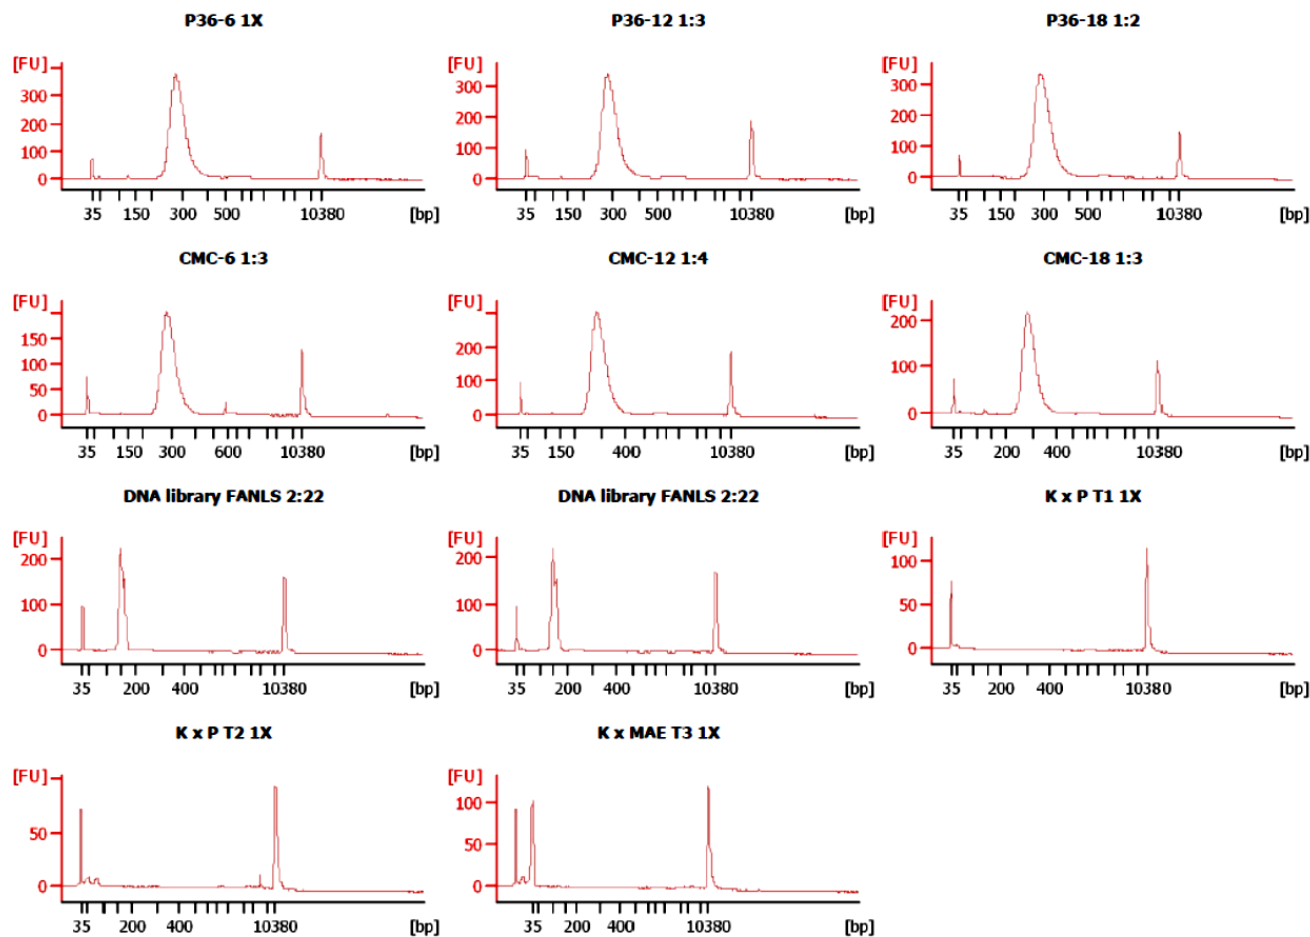

53 **Fig. S5.** Electrophoresis run summary using Bioanalyzer 2100 expert\_High Sensitivity DNA Assays shows cDNA  
 54 libraries in gels and electropherograms. The cDNA libraries were generated using total RNAs from cassava leaves.  
 55 The graph shows length distribution curves of sequencing libraries that were generated using a low-cost library  
 56 construction protocol [28].  
 57  
 58

59  
60  
61  
62

**Table S1. Yields according to A260:A280 and A260:A230 ratios of isolated total RNA from cassava leaf tissues (HMC-1 cultivar), which extracted by Trizol Method**

| sample | ng/ul  | 260/280 | 260/320 |
|--------|--------|---------|---------|
| 1      | 45.1   | 1.57    | 0.66    |
| 2      | 46.8   | 1.12    | 0.26    |
| 3      | 461.8  | 0.93    | -6.26   |
| 4      | -222.9 | 0.71    | 0.4     |
| 5      | 352.4  | 0.89    | -8.37   |
| 6      | 83     | 1.08    | 0.29    |
| 7      | 73.7   | 1.72    | 0.86    |
| 8      | 132.2  | 1.75    | 0.91    |
| 9      | 375.5  | 1       | 1.73    |
| 10     | 121.7  | 1.81    | 0.97    |
| 3-1    | 211.1  | 0.85    | 0.63    |
| 3-2    | 57.8   | 1.28    | 0.45    |
| 3-3    | 63.2   | 1.44    | 0.55    |
| 4-1    | 325.4  | 1.3     | 0.41    |
| 4-2    | 1037.5 | 0.99    | 0.37    |
| 4-3    | 811.7  | 0.8     | 0.56    |

63  
64  
65  
66  
67  
68  
69  
70  
71  
72  
73  
74  
75  
76  
77  
78  
79  
80  
81  
82  
83  
84  
85  
86  
87

**Table S2:** Yields according to  $A_{260}:A_{280}$  and  $A_{260}:A_{230}$  ratios of isolated total RNA from various cassava tissues.

| Name  | Tissue                                                  | Yield (ng/μl) | 260/<br>280 | 260/<br>230 |
|-------|---------------------------------------------------------|---------------|-------------|-------------|
| 71    | HMC-1 0H-SD, Third leaf                                 | 2580.5        | 2.05        | 2.21        |
| 72    | HMC-1 4H -SD, Third leaf                                | 1729          | 2.05        | 2.24        |
| 73    | HMC-1 8H-SD, Third leaf                                 | 2876          | 2.02        | 2.19        |
| 74    | HMC-1 12H -SD, Third leaf                               | 2121.8        | 2.06        | 2.07        |
| 75    | HMC-1 16H -SD, Third leaf                               | 1916.5        | 2.06        | 2.26        |
| 76    | HMC-1 20H-SD, Third leaf                                | 1270          | 2.14        | 2.03        |
| 77    | HMC-1 24H-SD, Third leaf                                | 3132.9        | 2.08        | 2.19        |
| 183   | Esparrago 0H-SD, Third leaf                             | 1701.8        | 2.19        | 2.34        |
| 184   | Esparrago 4H -SD , Third leaf                           | 2232.7        | 2.15        | 2.18        |
| 185   | Esparrago 8H-SD, Third leaf                             | 2820.3        | 2.1         | 2.18        |
| 186   | Esparrago 12H -SD, Third leaf                           | 2582.6        | 2.07        | 2.18        |
| 187   | Esparrago 16H -SD, Third leaf                           | 2133.2        | 2.08        | 2.29        |
| 188   | Esparrago 20H-SD , Third leaf                           | 1800.5        | 2.1         | 2.24        |
| 189   | Esparrago 24H-SD , Third leaf                           | 2045.5        | 2.09        | 2.25        |
| TL66  | HMC-1Buds and young leaves Rep II<br>(from Pot in 15°C) | 1826.3        | 2.11        | 2.13        |
| TL72  | HMC-1 Stem Rep II (from Pot in 15°C)                    | 1115          | 2.09        | 2.05        |
| TL120 | HMC-1Buds and young leaves Rep I<br>(from Pot in 30°C)  | 1992.6        | 2.08        | 2.03        |
| TL126 | HMC-1 Stem Rep I (from Pot in 30°C)                     | 470.1         | 2.06        | 2.04        |
| TL138 | HMC-1Buds and young leaves<br>Rep(from Pot in 30°C)     | 1943.6        | 2.09        | 2.01        |

| Name  | Tissue                                                          | Yield<br>(ng/ $\mu$ l) | 260/<br>280 | 260/<br>230 |
|-------|-----------------------------------------------------------------|------------------------|-------------|-------------|
| TL144 | HMC-1 Stem Rep II<br>(from Pot in 30°C)                         | 1338.9                 | 2.11        | 2.04        |
| IL48  | HMC-1 Leaves Repl<br>(from <i>In-vitro</i> samples in 15°C)     | 2217.5                 | 2.02        | 1.86        |
| IL51  | HMC-1 Stem from Repl<br>(from <i>In-vitro</i> samples in 15°C)  | 1217.3                 | 2.12        | 2.13        |
| IL54  | HMC-1 Roots from Repl<br>(from <i>In-vitro</i> samples in 15°C) | 1561.3                 | 2.11        | 2.07        |
| IL66  | HMC-1 Leaves Repl<br>(from <i>In-vitro</i> samples in 15°C)     | 1343.3                 | 2.12        | 2.11        |
| IL69  | HMC-1 Stem from Repl<br>(from <i>In-vitro</i> samples in 15°C)  | 213.1                  | 2.1         | 2.06        |
| IL72  | HMC-1 Roots from Repl<br>(from <i>In-vitro</i> samples in 15°C) | 753.4                  | 2.14        | 2.22        |
| IL120 | HMC-1 Leaves Repl<br>(from <i>In-vitro</i> samples in 30°C)     | 2188.9                 | 2.07        | 2.21        |
| IL123 | HMC-1 Stem from Repl<br>(from <i>In-vitro</i> samples in 30°C)  | 783.7                  | 2.11        | 2.19        |
| IL144 | HMC-1 Roots from Repl<br>(from <i>In-vitro</i> samples in 30°C) | 605.8                  | 2.08        | 1.81        |

94  
95  
96  
97  
98  
99  
100  
101  
102  
103  
104  
105  
106  
107  
108  
109  
110  
111



Table S3: The cost of extracted RNA based on our methodology and different RNA extraction kits.

| Methodology                  | Description                                                          | Unit           | QTY | Price* (USD/\$) | QTY/ sample         | Price per sample (USD) | RNA yield |
|------------------------------|----------------------------------------------------------------------|----------------|-----|-----------------|---------------------|------------------------|-----------|
| Our methodology**            | Eppendorf Safe-Lock Tubes™, 2.0 mL per 500 pieces, Cat #022363352    | PCK            | 1   | 54.83           | 1 tube x 6          | 0.55196                |           |
|                              | Acid Phenol:Chloroform, pH 4.5 (with IAA, 12.5:24:1) Ambion          | BTX 400 mL     | 1   | 180             | 1 sample (0.5 mL)   | 0.108                  |           |
|                              | Lithium chloride solution 9M, REF L1026, SIGMA                       | BTX 500 mL     | 1   | 98.9            | 1 sample (0.5 mL)   | 0.03356                |           |
|                              | Sodium chloride solution 9M, S5150-1L SIGMA                          | BTX 1 L        | 1   | 65              | 1 sample (0.05 mL)  | 0.0013                 |           |
|                              | Ultrapur 1M Tris-HCl pH: 7.5, 15561-021 SIGMA                        | BTX 1 L        | 1   | 44.18           | 1 sample (0.25 mL)  | 0.004416               |           |
|                              | 0.5M EDTA, pH 8.0 Molecular Biology Grade, Promega                   | BTX 400 mL     | 1   | 150             | 1 sample (0.125 mL) | 0.1875                 |           |
|                              | 2-Mercaptoethanol M6250, SIGMA                                       | BTX 500 mL     | 1   | 19.01           | 1 sample (0.05 mL)  | 0.0031604              |           |
|                              | SDS Sodium Dodecyl sulfate, L3111 SIGMA                              | BTX 1 Kg       | 1   | 415             | 1 sample (0.025 g)  | 0.00415                |           |
|                              | POLYVINYLPIRROLIDONE AVERAGE MOL WT 40,000 -PVP40 SIGMA              | BTX 1 Kg       | 1   | 329             | 1 sample (0.05 g)   | 0.00658                |           |
|                              | Absolute Alcohol, Merck                                              | BTX 2.5 L      | 1   | 64.42           | 1 sample (2 mL)     | 0.051936               |           |
|                              | Chloroform, Merck                                                    | BTX 2.5 L      | 1   | 182.99          | 1 sample (4 mL)     | 0.292794               |           |
|                              | Isamyl Alcohol, Merck                                                | BTX 2.5 L      | 1   | 42.84           | 1 sample (10 ul)    | 0.0001112              |           |
|                              | UltraPure Water, Invitrogen                                          | PK 10 X 500 mL | 1   | 234             | 1 sample (1 mL)     | 0.03144                |           |
|                              |                                                                      |                |     |                 |                     | 13906116               | 6 ug      |
|                              |                                                                      |                |     |                 |                     | <del>0.2917696</del>   | 1 ug      |
| QIAGEN KIT                   | Qiagen Plant RNeasy, 50 samples                                      | KT X 50 RXN    | 1   | 319             | 1 sample            | 1.98                   |           |
|                              | Absolute Alcohol Merck***                                            | BTX 2.5 L      | 1   | 31              | 1 sample (2 mL)     | 0.062                  |           |
|                              |                                                                      |                |     |                 | 7.642               | 1 ug                   |           |
|                              |                                                                      |                |     |                 | 4.862               | 6 ug                   |           |
| Spectrum Plant Total RNA kit | Spectrum Plant Total RNA kit, SIGMA, STRN50-1KT, 50 samples          | KT X 50 RXN    | 1   | 289             | 1 sample            | 5.16                   |           |
|                              | Absolute Alcohol Merck***                                            | BTX 2.5 L      | 1   | 31              | 1 sample (2 mL)     | 0.062                  |           |
|                              | Eppendorf Safe-Lock Tubes™, 2.0 mL, per 500 pieces Cat #022363352*** | PCK            | 1   | 54.83           | 1 tube              | 0.10966                |           |
|                              |                                                                      |                |     |                 | <del>0.29361</del>  | 1 ug****               |           |
|                              |                                                                      |                |     |                 | 5.93166             | 6 ug****               |           |
| PicoPure RNA Isolation Kit   | PicoPure RNA Isolation Kit 200 RXN, Life Technologies                | KT X 200 RXN   | 1   | 1598            | 1 sample            | 4.194                  | 6 ug      |
|                              |                                                                      |                |     |                 |                     | 0.4794                 | 1 ug      |

\*All prices are from the catalog, including those of the kit

\*\*Calculated prices for 1 sample / 1 mL of buffer, from 100 mg of tissue

\*\*\*Reagents are not included in the kit

\*\*\*\*Yields can vary depending on the age, health and stress level of the plant (Merck's user's note)
